# Supplementary material for: Improving the electrochemical performance of organic Li-ion battery electrodes
Source: Royal Society of Chemistry journal article supplement (doi:10.1039/c3cc39065a), 2013-01-01
Supplement: c3cc39065a.pdf [file c3cc39065a.pdf]

## Electronic Supplementary Information

# Improving the electrochemical performance of organic Li-ion battery electrodes

Stéven Renault,<sup>a</sup> Daniel Brandell,<sup>a</sup> Torbjörn Gustafsson<sup>a</sup> and Kristina Edström<sup>\*a</sup>

<sup>a</sup>Dept. of Chemistry - Ångström Laboratory, Lägerhyddsvägen 1, Polacksbacken, 751 21

Uppsala, Sweden

## Contents

|                                                |   |
|------------------------------------------------|---|
| 1. Experimental details                        | 2 |
| 2. Figure S1: <sup>1</sup> H NMR spectra of 1  | 3 |
| 3. Figure S2: <sup>13</sup> C NMR spectra of 1 | 4 |
| 4. Figure S3: FTIR spectra of 1                | 5 |

Notes: no significant peaks are seen in the 4000-1700 cm<sup>-1</sup> region.

## 1. Experimental details

### General Methods

Solvents and reagents were purchased from Aldrich or Alfa Aesar and were used as received.  $^1\text{H}$  and  $^{13}\text{C}$  NMR spectra were recorded at 400 MHz and 100 MHz on a JEOL ECP-400 spectrometer, at room temperature, respectively. Chemical shifts ( $\delta$ ) were expressed in part per million (ppm) relative to residual  $\text{D}_2\text{O}$  or an internal standard. Infrared spectra were performed with a PerkinElmer Spectrum One FT-IR spectrometer in the  $650\text{--}4000\text{ cm}^{-1}$  frequency range equipped with an attenuated total reflectance probe (ATR). The positive electrode was prepared without binder by mixing organic compounds with 33% carbon SP (in total mass) in the solid state (Method A) or in the liquid state (Method B). Mechanical mixing was carried out on a Restch during 1 hour. The powder and 2 balls (diameter 20 mm) were stowed in a milling container (55mL). Electrochemical performances were tested vs. lithium in Swagelok<sup>®</sup>-type cells using Li metal disc as negative electrode and a fibreglass separator soaked with a molar LiTFSI solution in DMC as the electrolyte. Cells were cycled in galvanostatic mode using an Arbin BT-2043 system. The morphology of the samples was observed using a high resolution scanning electron microscopy (HRSEM LEO 1550).

### Synthesis of dilithium benzenediacylate (1): Method A

221.7 mg of lithium carbonate (3 mmol) and 654.6 mg of benzenediacylic acid **4** (3 mmol) were stirred in 20 mL of a  $\text{H}_2\text{O}/\text{EtOH}$  solution (1:1 v/v) at  $50^\circ\text{C}$  for 48 hours. Solvents were eliminated by drying in a ventilated oven at  $100^\circ\text{C}$  for 15 hours. The white crystalline powder was then transferred into a glovebox and dried under vacuum at  $100^\circ\text{C}$  for 12 hours and 676 mg of dilithium *trans,trans* benzenediacylate **1** was obtained (yield = 98%).

$\nu_{\text{max}}/\text{cm}^{-1}$  1638, 1574, 1510, 1422, 1396, 1259, 1105, 971, 890, 843, 826, 708, 668;  $^1\text{H}$  NMR (400 MHz,  $\text{D}_2\text{O}$ )  $\delta$  (ppm): 6.53 (d, 15.7 Hz, 2H,  $\text{CH-CO}_2$ ); 7.37 (d, 16.1 Hz, 2H,  $\text{CH=CH-CO}_2$ ); 7.58 (s, 4H,  $\text{C}_6\text{H}_4$ );  $^{13}\text{C}$  NMR (100 MHz,  $\text{D}_2\text{O}$ )  $\delta$  (ppm): 124.9 ( $\text{CH-CO}_2$ ); 128.3 ( $\text{CH}$  phenylene); 136.4 ( $\text{C-CH=CH-CO}_2$ ); 140.3 ( $\text{CH=CH-CO}_2$ ); 175.8 ( $\text{CO}_2$ ).

### Method B

221.7 mg of lithium carbonate (3 mmol), 345.1 mg of carbon SP and 654.6 mg of benzenediacylic acid **4** (3 mmol) were stirred in 20 mL of a  $\text{H}_2\text{O}/\text{EtOH}$  solution (1:1 v/v) at  $50^\circ\text{C}$  for 48 hours. Solvents were eliminated by drying in a ventilated oven at  $100^\circ\text{C}$  for 15 hours. The powder was then transferred into a glovebox and dried under vacuum at  $100^\circ\text{C}$  for 12 hours. 1.012 g of the mixture dilithium *trans,trans* benzenediacylate **1**/carbon SP was obtained (yield = 98%).
