# Supplementary material for: Improving the electrochemical performance of organic Li-ion battery electrodes
Source: Royal Society of Chemistry journal article supplement (doi:10.1039/c3cc39065a), 2013-01-01
Supplement: c3cc39065a_3.pdf [file c3cc39065a_3.pdf]

X : parts per Million : 13C

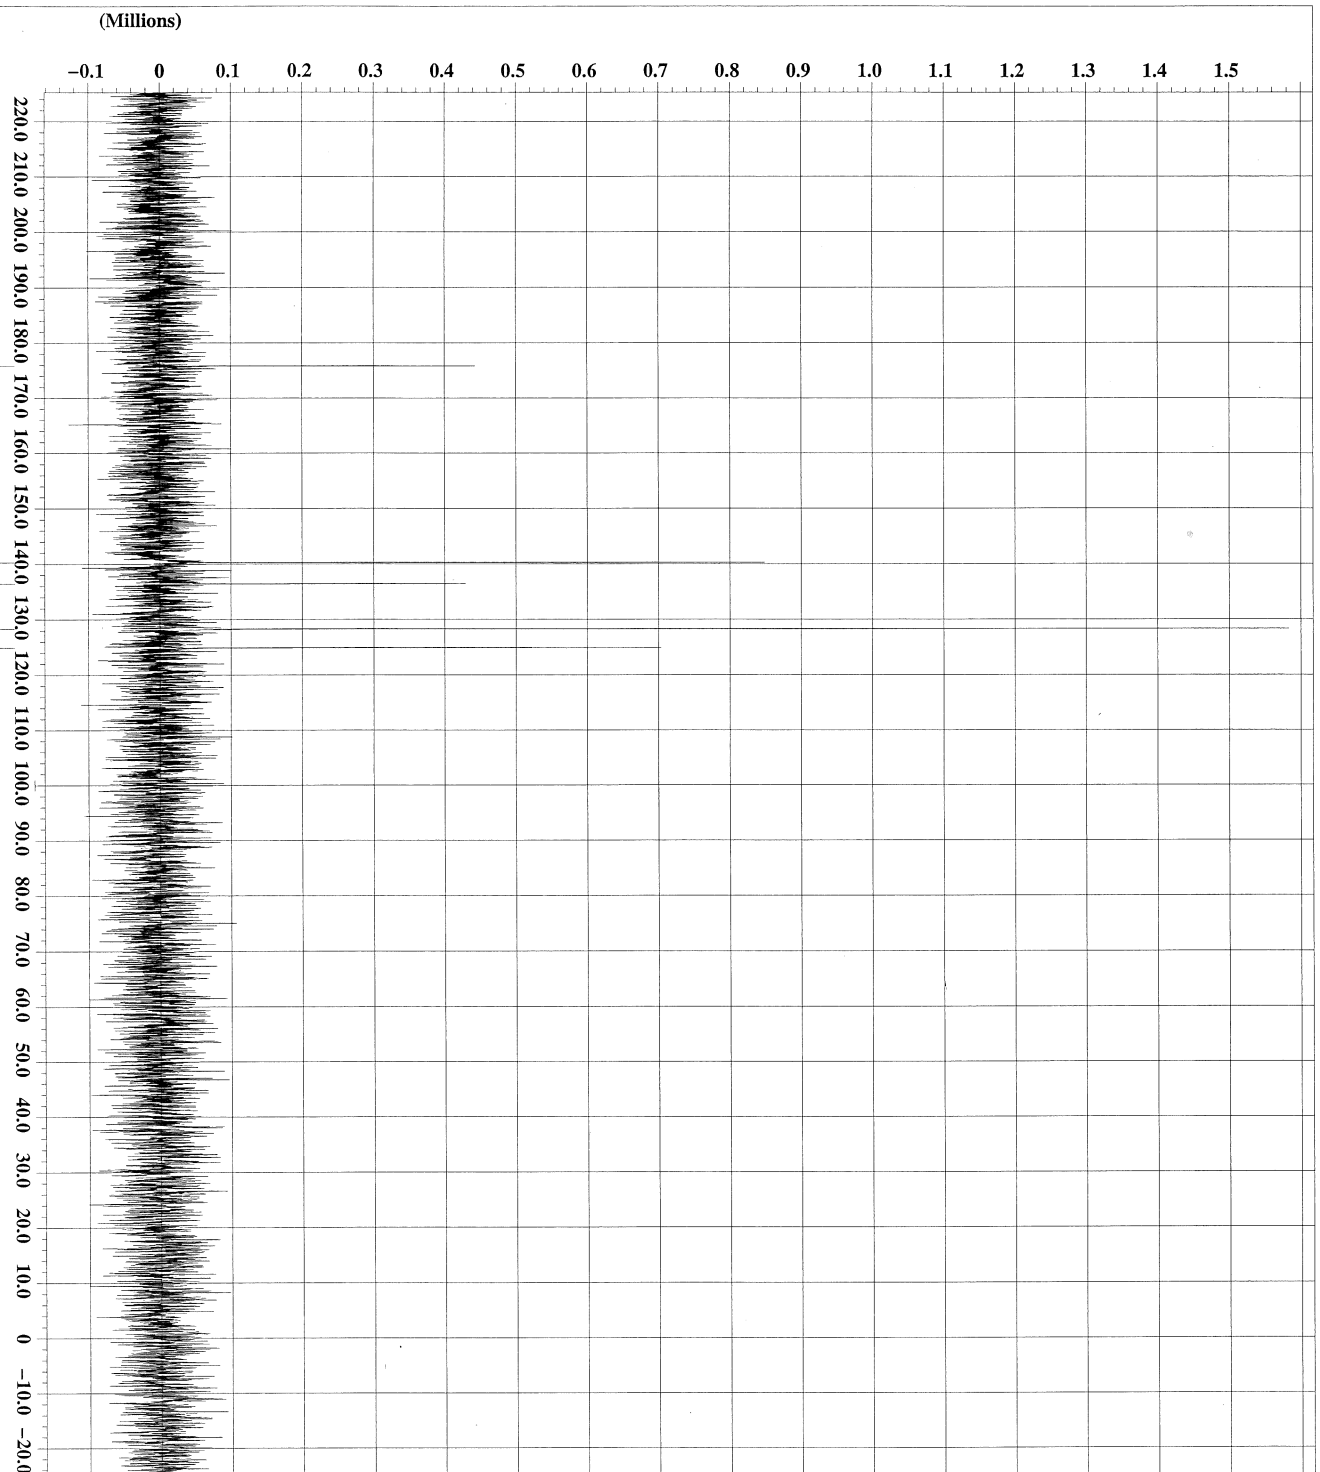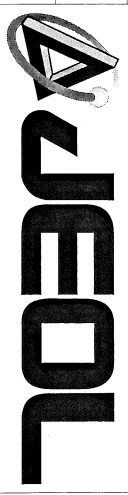

Filename = 1d\_13c\_spectrum-40.jd  
Author = steven  
Experiment = single\_pulse\_dec  
Sample\_id = sr120\_d2o  
Solvent = D2O  
Creation\_time = 19-NOV-2012 13:14:34  
Revision\_time = 17-DEC-2012 11:26:17  
Current\_time = 17-DEC-2012 11:26:34  
  
Content = Single Pulse with Bro  
Data\_format = ID COMPLEX  
Dim\_size = 32768  
Dim\_title = 13C  
Dim\_units = [ppm]  
Dimensions = X  
Site = Eclipse+ 400  
Spectrometer = DELTA NMR  
  
Field\_strength = 9.389766[T] (400[Mhz])  
X\_acq\_duration = 1.3008896[s]  
X\_domain = 13C  
X\_freq = 100.52530333[Mhz]  
X\_offset = 100[ppm]  
X\_points = 32768  
X\_prescans = 4  
X\_resolutions = 0.76870474[Hz]  
X\_sweep = 25.18891688[kHz]  
Irr\_domain = 1H  
Irr\_freq = 399.78219838[Mhz]  
Irr\_offset = 5[ppm]  
Clipped = TRUE  
Mod\_return = 1  
Scans = 196  
Total\_scans = 196  
  
X\_90\_width = 9.7[us]  
X\_acq\_time = 1.3008896[s]  
X\_angle = 30[deg]  
X\_pulse = 3.23333333[us]  
Initial\_wait = 1[us]  
Phase\_preset = 3[us]  
Recvr\_gain = 29  
Relaxation\_delay = 2[us]  
Temp\_get = 23.9[dc]  
Unblank\_time = 2[us]
